# Supplementary material for: Gold-Nanorod-Assisted Live Cell Nuclear Imaging Based on Near-Infrared II Dark-Field Microscopy
Source: MDPI journal article supplement (doi:10.3390/biology12111391), 2023-10-31
Supplement: s1 [file s1]

Supplementary Materials:

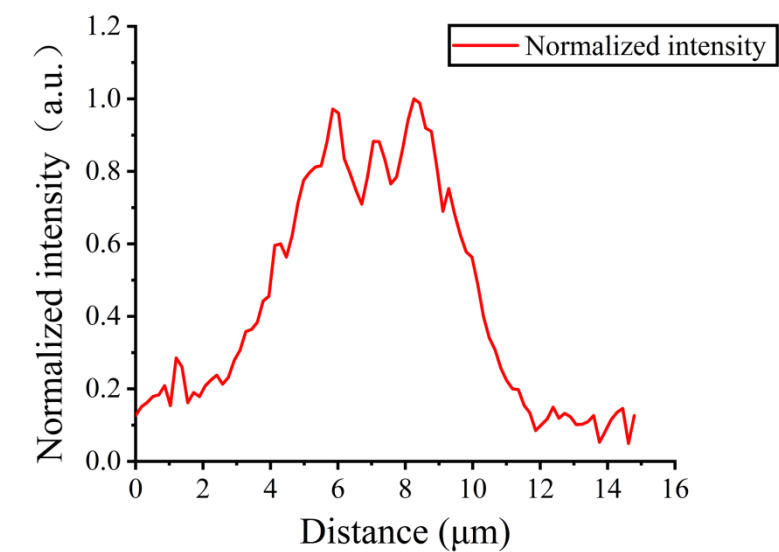

**Figure S1:** The cross-sectional signal along the red dashed line of the cell in Figure 4d, indicating a relatively uniform intensity of the cytoplasm and nucleus.

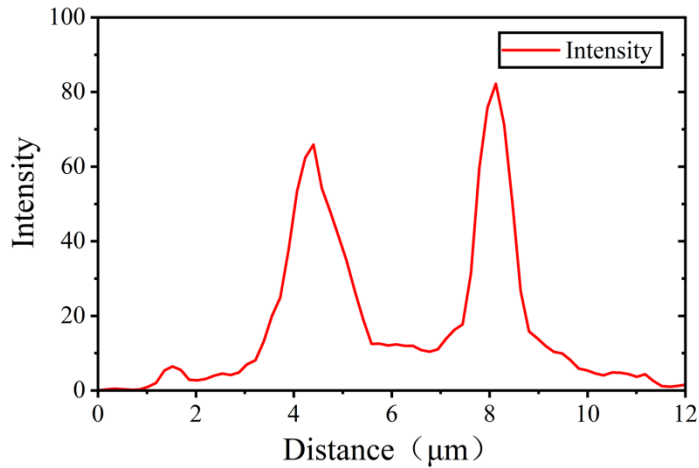

**Figure S2:** The cross-sectional signal along the red dashed line of the cell in Figure 6d, indicating a bright cytoplasm and rather dark nucleus.

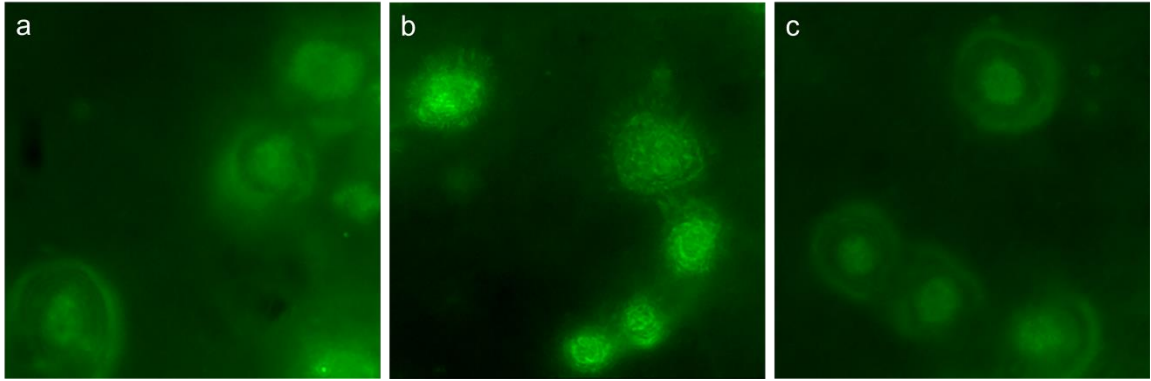

**Figure S3:** Images from other fields. (a),(b),(c): Images of cells incubated with GNR-RGD-NLS.
